# Supplementary material for: Melatonin and (−)-Epigallocatechin-3-Gallate: Partners in Fighting Cancer
Source: MDPI journal article supplement (doi:10.3390/cells8070745), 2019-07-19
Supplement: s1 [file s1]

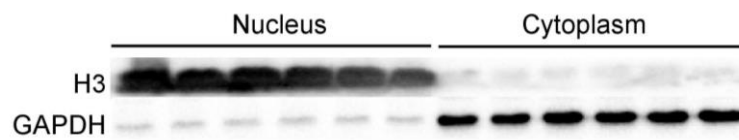

**Supplementary Figure S1.** Validation of the purity of the cellular fractions by using TCA8113 cells. (n = 6).

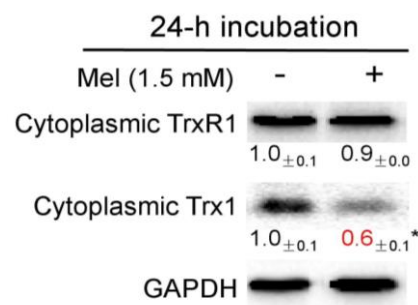

**Supplementary Figure S2.** Cytoplasmic TrxR1 and Trx1 in response to melatonin treatment in TCA8113 cells.

Data are presented as mean ± SEM (n = 6). Compared to the control, \* p < 0.05.

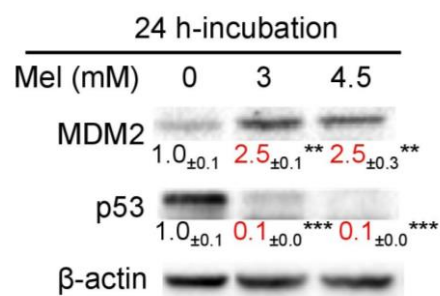

**Supplementary Figure S3.** The expression of MDM2 and p53 proteins in HepG2 cells treated with melatonin.

Data are presented as mean ± SEM (n = 3). Compared to the control, \*\* p < 0.01 and \*\*\* p < 0.001.
